# 1 **Trends in plant ecology research in Ethiopia (1969-2019):**

## 2 **Systematic analysis**

### 3 **Short title: Trends in plant ecology research in Ethiopia**

4 **Kflay Gebrehiwot<sup>1,\*</sup> and Sebsebe Demissew<sup>2&</sup>**

5 <sup>1</sup> Department of Biology, Samara University, Semera, Ethiopia

6 <sup>2</sup> Department of Plant Biology and Biodiversity Management, Addis Ababa University, Addis  
7 Ababa, Ethiopia

8 \*Corresponding Author: email: [kflay77@gmail.com](mailto:kflay77@gmail.com) (KG)

9

## 10 **Abstract**

11 The objective of this paper was to systematically analyze the trend of plant ecological research in  
12 Ethiopia. The inclusion and exclusion of the articles for analysis were performed using Reporting  
13 Standards for Systematic Evidence Syntheses (ROSES) flow diagram developed for systematic  
14 review/meta-analysis. The number of articles published, authors, and collaboration has increased  
15 dramatically since the 1960s. Most of the research largely focused on the Dry evergreen  
16 Afromontane Forest and grassland complex (DAF) and Moist evergreen Afromontane Forest  
17 (MAF) vegetation types, comprising of about 52.6%. Of the remaining vegetation types, the  
18 woodlands (14.3%) i.e. *Acacia-Commiphora* woodland and bushland proper (ACW), and  
19 *Combretum-Terminalia* woodland and wooded grassland (CTW), desert and semi-desert scrubland

20 (DSS) (2.3%), and the Afroalpine (AA) and Ericaceous Belt (EB) (1.5%) received little attention.  
21 A descriptive study on plant community ecology revolving on floristic composition and  
22 community structure is the dominant research theme, which revealed a narrow theme in contrast  
23 to the global trend. Other plant ecological studies such as reproductive and dispersal ecology of  
24 invasive plant species, and pollination ecology seems largely a neglected topic by the academia.  
25 Furthermore, the recommendations forwarded are not result-based. As a future direction, the  
26 Ethiopian government should develop a project database both for completed and ongoing projects.  
27 **Keywords:** DAF, MAF, Research syntheses, ROSES, Systematic review, Vegetation ecology

28

## 29 **Introduction**

30 Plant ecology as a standalone discipline of botany has a long history. It is highly linked to the  
31 works of Alexander von Humbolt in the early nineteenth century [1]. Subsequently, some branches  
32 of plant ecology such as synecology and autecology, which emphasizes on community ecology  
33 and individual species respectively, emerged. From the early 19<sup>th</sup> century onwards, plant ecologists  
34 have studied stands of vegetation, which they considered samples of a plant community [2].  
35 Nowadays, however, traditional ecological terms (synecology and autecology) are replaced by  
36 specialties such as population ecology, community ecology, ecosystem ecology, ecological  
37 modeling, global change biology, and remote sensing [1,3,4].

38 Even though the debate is continuing in the 21<sup>st</sup> century, the community ‘discrete’ [5] and  
39 community ‘continuum’ [6] were at the center of two different views. Vegetation ecology research  
40 which focused on plant communities, the effect of abiotic environment on plant distribution, had  
41 been the center of ecological research during the first half of the twentieth century [1]. However,  
42 in the late 1960s advances in population genetics and the evolutionary theory shifted the theme of

43 plant ecological research into a broader scope, which includes population ecology that combined  
44 mathematical modeling and experimentation to investigate population growth, dispersal, and  
45 competition from an explicitly Darwinian perspective [1,3,4,7,8].

46 Plant ecology research employs a wide array of methods depending on the objectives set. These  
47 might vary in terms of spatial and temporal scale, organizational levels such as species, population,  
48 community, and ecosystem. Hence, the approaches could be either classical or advanced [9].  
49 Although the use of some classical approaches could be retained, several plant ecology research  
50 methods are being evolved. Consequently, various research in plant ecology are becoming more  
51 reputable than earlier ones. This has a massive contribution to vegetation management and  
52 biodiversity conservation.

53 According to the information extracted from different sources, plant ecology research in  
54 Ethiopia started in the late 1960s. The objective of the, probably, first empirical plant ecology  
55 research in Ethiopia was to test the community ecology hypotheses [10]. Since Beals' publication,  
56 significant numbers of plant ecological research have been conducted.

57 Peters [11] criticized and argued that ecology as science hasn't grown up rather the science  
58 moves forward slowly. On his critical response to Peters' critics and argument, Grace [3]  
59 countered that ecological research is growing both in scope and citation impact as well. However,  
60 there is no empirical data on the trend of plant ecology researches in Ethiopia. Furthermore, the  
61 progress of plant ecology research in the country is not known to date. Consequently, it is  
62 challenging to judge the impact of these researches on policy development and conservation  
63 actions. Therefore, a thorough bibliographic analysis of plant ecology research in Ethiopia is  
64 inevitable to understand if the discipline is growing up as a science. This could have a crucial role  
65 in showing what has been done so far and what should be in this field.

66 The objective of this paper is thus to systematically analyze the trend of plant ecological  
67 research in Ethiopia with the aim to provide responses to the questions: i) what are the most  
68 researched vegetation (natural ecosystems such as forests) and land use types (the purpose for  
69 which the land is used such as farmland) ii) What are the most researched domains of plant  
70 ecology, iii) are plant ecology researches influencing national policy, and iv) are there financial  
71 resources to fund ecological research from government and other sources?  
72

## 73 **Methodology**

### 74 **Data sources and key search terms used**

75 The various research components were filtered and executed from different sources between  
76 the years 1969-2019. The sources include Scopus, PubMed, African Journal Online (AJOL), Addis  
77 Ababa University (AAU) theses and dissertation repository, and google scholar. The search terms  
78 used in executing the articles included from the title, abstract and keywords. The terms included  
79 in searching were; “Floristic” AND “Ethiopia”; “woody” AND “diversity” OR “structur” AND  
80 “Ethiopia”; “vegetation” AND “ecology” AND “Ethiopia”; “plant” AND “communit” AND  
81 “Ethiopia”; “ordination” AND “classification” AND “Ethiopia”; “species” AND “distribution”  
82 OR “Model” AND “Ethiopia”; “Restoration” AND “Ecologi”; and “Elevation” OR “Altitud”  
83 AND “gradient” OR “Environment” AND “Ethiopia”.

84 609 articles from Scopus, 21 Ph.D. and MSc theses from Addis Ababa University (AAU)  
85 Institutional repository/Electronic Theses and Dissertations, and 20 articles from AJOL were  
86 filtered. The theses and dissertations from AAU and articles extracted from AJOL were all used  
87 for the analysis. About 56 journals were involved in the systematic review (S1 & 2 appendix).

88 However, the articles from Scopus had to pass through a thorough selection procedure. In the first  
 89 phase, books and conference papers were excluded. In the second round, articles that emphasize  
 90 on land use/land cover change though their title includes terms like forest/vegetation cover were  
 91 excluded. The inclusion and exclusion of the articles for analysis are shown by using Reporting  
 92 Standards for Systematic Evidence Syntheses (ROSES) flow diagram developed for systematic  
 93 review/meta-analysis [12] (Fig 1).

94

95 **Fig 1.** ROSES flow diagram for inclusion and inclusion of research articles from several databases.  
 96 Modified from Haddaway et al. [12]

## 97 **Data analysis**

98 Pre-analysis coding system for the variables was performed (Table 1). The Authorship and  
 99 collaboration, plant ecological research components of research, descriptive/experimental,  
 100 vegetation types, community types, methods employed (sampling and analysis),  
 101 recommendations, and funding were coded. Descriptive statistics were employed for the analysis.

102 **Table 1.** Pre-analysis coding system for all category

| No. | Criteria               | Definition                                                        | Code                                                                                                                                                                                                                                         |
|-----|------------------------|-------------------------------------------------------------------|----------------------------------------------------------------------------------------------------------------------------------------------------------------------------------------------------------------------------------------------|
| 1   | Year of publication    | The year the publication published                                |                                                                                                                                                                                                                                              |
| 2   | Author/s collaboration | The affiliation of the author/s involved in the study             | 2.1 = Ethiopian, 2.2 = international collaboration, 2.3 = Foreign nationals only                                                                                                                                                             |
| 3   | Journal quartile       | indicator to evaluate the importance or visibility of a journal   | 3.0 = Indexed but doesn't indicate the journal quartile, 3.1 = Q1, 3.2 = Q2, 3.3 = Q3, 3.4 = Q4, Q5 = unindexed, Q6 = indexed in web of science but no quartile yet                                                                          |
| 4   | Objectives             | The objectives of the study (indication of the ecological domain) | 4.1 = floristic (woody/herbaceous), 4.2 = floristic, structure, Regeneration status (count), 4.3 = Floristic, structure, Soil Seedbank, 4.4 = Vegetation-Environmental-disturbance relationships OR carbon estimation, 4.5 = Theory-Approach |

|           |                      |                                                |                                                                                                                                                                                                                                                                                                                                                                                                                         |
|-----------|----------------------|------------------------------------------------|-------------------------------------------------------------------------------------------------------------------------------------------------------------------------------------------------------------------------------------------------------------------------------------------------------------------------------------------------------------------------------------------------------------------------|
|           |                      |                                                | development OR Life form/Functional Traits OR Climate change/ Sustainability, 4.6 = Vegetation-Environmental-disturbance relationships, GIS & Remote Sensing                                                                                                                                                                                                                                                            |
| <b>5</b>  | Vegetation types     | The site where the study is conducted          | 5.1 = AAS, 5.2 = DAF, 5.3 = MAF, 5.4 = CTW, 5.5 = ACW, 5.6 = SWG, 5.7 = DSS, 5.8 = Plantation forest, 5.9 = Area exclosure/watershed, 5.10 = Church forest, 5.11 = TRF, 5.12 = Riverine /wetland, 5.13 = Farming landscape, 5.14 = > 1 vegetation types, 5.15 = grasslands/rangelands, and 5.16 = Single species ecology                                                                                                |
| <b>6</b>  | Variables            | The biotic and abiotic parameters investigated | 6.1 = Woody/Herbaceous species, 6.2 = Floristic, Soil seed bank, disturbances, 6.3 = Floristic, geographic OR Satellite image, 6.4 = Floristic Soil OR satellite images and Aerial images, 6.5 = Floristic, geographic, soil, disturbance OR social/Sustainability, 6.6 = Floristic, geographic, soil, disturbance, Soil Seedbank 6.7 = Floristic, soil, geographic, Soil Seedbank, Remote Sensing/Allometric equations |
| <b>7</b>  | Sampling method      | The data collection design used in the study   | 7.0 = Not mentioned, 7.1 = random, 7.2 = systematic, 7.3 = preferential, 7.4 = stratified, 7.5 = combination, 7.6 = Plot + GIS, 7.7 = Experimental                                                                                                                                                                                                                                                                      |
| <b>8</b>  | Data analysis method | The data analysis method employed              | 8.1 = Descriptive, 8.2 = Descriptive, community classification, 8.3 = Descriptive, classification, ordination<br>8.4 = Descriptive, classification, ordination plus socio-economic, 8.5 = Model, 8.6 = Ordination and GIS/RS                                                                                                                                                                                            |
| <b>9</b>  | Recommendation       | The suggestions made in the article            | 9.0 = Not available, 9.1 = not result based, 9.2 = Shows gap 9.3 = Based on result                                                                                                                                                                                                                                                                                                                                      |
| <b>10</b> | Funding              | The source of funding to run the research      | 10.0 = not mentioned, 10.1 = government, 10.2 = international, 10.3 = government & others                                                                                                                                                                                                                                                                                                                               |

103

104

105

## 106 **Results**

### 107 **Authorship and collaboration**

108           Vegetation ecology research in Ethiopia started in the late 1960s (Fig 2a). However, there  
109 have been interruptions between 1960s and 1990s. There has been a dramatic increase after the  
110 1990s. The minimum and maximum articles published in 1969 and 2018 were 2 and 27  
111 respectively. Similarly, the number of authors also showed an increasing trend (Fig 2b). The  
112 highest number of authors, 24, was recorded in 2018.

113

114 **Fig 1.** Trend of plant ecology research in Ethiopia. (a) Number of published articles and (b) trend  
115 of plant ecological research collaboration

116           The author/s affiliation/collaboration involved showed local authors are dominant, 83  
117 (62%). On the other hand, international collaborators and foreign authors only comprised 48  
118 (35.8%) and 3 (2.2%) respectively. International collaborations had started in the late 1990s and  
119 grew steadily. On the contrary, the research conducted by foreign nationals only is negligible. The  
120 only articles published solely by the foreign nationals were in 1969 and 2017.

### 121 **Plant ecological research components**

122           Results revealed that most of the articles' objectives were descriptive (Table 2). A few  
123 articles dealt with some advanced objectives. About 42 (31%) of the articles' objectives were on  
124 the floristic survey, community structure analysis, and assessing the regeneration status of a forest  
125 based on a seedling, sapling, and mature tree count. Whereas, the Theory-Approach development  
126 OR Life form/Functional Traits OR Climate change/ Sustainability theme covered only 5 (3.7%)  
127 of the articles. Even though few articles are available about invasive plant species distribution, and

128 economic impact, studies on reproductive and dispersal ecology of invasive species is almost non-  
129 existent. Furthermore, pollination ecology seems the neglected topic in the Ethiopian academia.  
130 Exclusive to the very few articles on crop pollination such as Coffee (*Coffea arabica*) by honeybee  
131 (*Apis mellifera*), pollination ecology on indigenous and wild plants is badly missing.

132 **Table 2.** The thematic research topics in the articles

| <b>Objectives</b>                                                                            | <b>Frequency</b> | <b>Percent</b> |
|----------------------------------------------------------------------------------------------|------------------|----------------|
| Floristic (woody/herbaceous)                                                                 | 16               | 11.9           |
| Floristic, structure, Regeneration (count)                                                   | 42               | 31.3           |
| Floristic, structure, SSB                                                                    | 28               | 20.9           |
| Vegetation-Environmental-disturbance relationships OR carbon estimation                      | 35               | 26.1           |
| Theory-Approach development OR Life form/Functional Traits OR Climate change/ Sustainability | 5                | 3.7            |
| Vegetation-Environmental-disturbance relationships, GIS & RS                                 | 8                | 6.0            |
| Total                                                                                        | 134              | 100.0          |

133

## 134 **Descriptive/Experimental**

135 Out of the 134 articles reviewed, only two articles were experimental while the remaining  
136 are descriptive. One of these articles investigated the tree regeneration potential of only four  
137 species namely *Juniperus procera*, *Ekebergia capensis*, *Prunus africana* and *Olea europaea*  
138 subsp. *cuspidata* under three conditions i.e., along the interior and edge forest gradients, canopy  
139 cover, and grazing intensity [13]. The other article determined the floristic composition and soil  
140 seed bank richness using manure and livestock grazing as treatments [14]. The objective of these  
141 two articles is in a similar domain.

142



## 143 **Plant ecological research on vegetation and land use types**

144 Most of the the plant ecological research articles in Ethiopia focused on the DAF and MAF  
145 vegetation types (Figs 3 & 4). Research on these vegetation types comprised about 52.6%.  
146 However, the woodlands (14.3%) i.e. *Acacia-Commiphora* woodland and bushland proper (ACB),  
147 and *Combretum-Terminalia* woodland and wooded grassland (CTW), desert and semi-desert  
148 scrubland (DSS) (2.3%), and the threatened Afroalpine (AA) and Ericaceous Belt (EB)(1.5%)  
149 received little attention. The Transitional Rain Forest (TRF) vegetation type was represented by  
150 only one article. Furthermore, nearly 8.3% of the studies covered more than one vegetation types.  
151 The church forests, grasslands/rangelands, area exclosures comprised 5.3%, 3.8% and 3.8%  
152 respectively. Apart from the natural vegetation types, other land uses have also been an area plant  
153 ecological research. Plant ecology research on farmland landscape and plantation forests  
154 comprised 1.5 and 2.3% respectively. About 2.3% of the studies were focused on single species.  
155 Nevertheless, the absence of appropriate geographical coordinates make tracing some of the study  
156 sites extremely challenging.

157 **Fig 2.** Distribution of the studies in vegetation types and land uses

## 158 **Plant Community types**

159 About 43% of the studies reported plant community types analysis. The number of  
160 communities varied from 2 to 9 with a mean of 5 communities. However, some articles didn't  
161 follow the standard community (*Juniperus – Olea* community) naming procedure while others  
162 showed some deviation in the characteristic species of vegetation types. For example, *Olinia*  
163 *rochetiana* (Oliniaceae) is described as a characteristic species of the DAF [15]. However, this  
164 species was reported as a characteristic species of MAF. Furthermore, although *Erica arborea* is

165 a characteristic species of Ericaceous Belt, about four articles reported it as a community of the  
166 DAF. Furthermore, a shrub/tree and herb (for example, *Albizia schimperiana* - *Hypoestes*  
167 *forskaolii*, *Hyparrhenia filipendula* - *Combretum molle*) were frequently used to name a plant  
168 community. Others also named plant community after a weed such as *Achyranthes aspera*. Overlap  
169 of plant community types between vegetation types were also reported in different articles. For  
170 example, *Arundinaria alpina* and *Maesa lanceolata* - *Brucea antidysenterica* communities were  
171 reported both from DAF and MAF.

172

173 **Fig 3.** Map of the studies with formal coordinates (red dots) and the corresponding vegetation  
174 types (AA = Afroalpine Belt, ACB = *Acacia-Commiphora* woodland and bushland proper, EB =  
175 Ericaceous Belt, MAF = Moist evergreen Afromontane Forest, DAF = Dry evergreen  
176 Afromontane Forest, TRF = Transitional Rain Forest, DSS = Desert and semi-desert scrubland,  
177 CTW = *Combretum-Terminalia* woodland and wooded grassland, ACB/RV = *Acacia* wooded  
178 grassland of the Rift Valley, WGG = Wooded grassland of the Western Gambela region ,  
179 FLV/MFS = Freshwater marshes and swamps, floodplains and lake shore vegetation, FLV/OW =  
180 Freshwater lakes - open water vegetation, SLV/SSS = Salt pans, saline/brackish and intermittent  
181 wetlands and salt-lake shore vegetation, and SLV/OW = Salt lakes - open water vegetation)  
182 [15,16].

### 183 **Methods employed by the studies**

184 The selection of data collection and analysis methods might be based on the availability of  
185 time, fund, expertise, and objectives amongst others. In the present review 86 (64.2%) of the  
186 studies employed systematic sampling while a combination of sampling methods and plot-based

187 data collection supported by GIS only accounted 6 (4.4%) studies. The analysis methods also  
 188 revealed above 50% of the articles were descriptive (Table 3).

189 **Table 3.** Descriptive statistics of the sampling and analysis method of the studies reviewed

| Sampling Method |           |             | Analysis Method                                                       |           |             |
|-----------------|-----------|-------------|-----------------------------------------------------------------------|-----------|-------------|
| Description     | Frequency | Percent (%) | Description                                                           | Frequency | Percent (%) |
| Not mentioned   | 14        | 10.4        | Descriptive                                                           | 31        | 23.1        |
| Random          | 5         | 3.7         | Descriptive & community classification                                | 34        | 25.4        |
| Systematic      | 86        | 64.2        | Descriptive, community classification, & ordination                   | 24        | 17.9        |
| Preferential    | 14        | 10.4        | Descriptive, community classification, ordination plus socio-economic | 5         | 3.7         |
| Stratified      | 6         | 4.5         | ANOVA & MODEL                                                         | 25        | 18.7        |
| Combined        | 5         | 3.7         | Ordination & GIS/RS                                                   | 15        | 11.2        |
| Plot & GIS      | 1         | .7          |                                                                       | 134       | 100         |
| Total           | 134       | 100         |                                                                       |           |             |

190

## 191 **Journal quartile of the articles published**

192 In terms of journal quartile, most of the articles (24.6%) were published in the first quartile  
 193 and second quartile (Fig 5). The articles that were retrieved from African Journals Online (AJOL)  
 194 and Addis Ababa Dissertation/Theses repository were not indexed though Momona Ethiopian  
 195 Journal of Science (MEJS) is indexed in Web of Science and tracked for impact.

196 **Fig 4.** Journal quartile of the articles reviewed (Q1 = quartile 1, Q2 = quartile 2, Q3 = quartile 3,  
 197 Q4 = quartile 4, UI = Unindexed, WS = indexed in web of Science but no quartile value yet). The  
 198 Journal quartile value is obtained from Scimago (<https://www.scimagojr.com/>)

199

200

201

## 202 **Recommendations forwarded by the studies**

203 Most of the studies' recommendations are not based on the results of the research (38.1%,  
204 n = 51). For example, some floristic composition studies recommended establishment of 'Natural  
205 reserve' or 'Biosphere Reserve'. Although floristic study is part of biosphere reserve, proposing  
206 'Natural reserve' or 'Biosphere Reserve' based on solely floristic list is far beyond the minimum  
207 requirement. Only 21.6% (n = 29) of the results revealed that the recommendations are based on  
208 the results. On the other hand, 16.4% (n = 22) of the recommendations showed the gaps that were  
209 not covered in their studies. On the other hand, several studies (23.9%, n = 32) did not imply any  
210 recommendation.

## 211 **Funding source reported**

212 The funding source for the articles reviewed was dominantly from international funders  
213 43.3% (n = 58) and government 35.1% (n = 47). The remaining articles' funding sources were  
214 either collaborative (8.2%, n = 11) or did not mention (13.4%, n = 18) their funder. Although the  
215 international funding sources have made a significant contribution, the thematic of most of the  
216 articles was descriptive as shown in the previous sections.

217

## 218 **Discussion**

### 219 **Authorship and collaboration**

220 The very few plant ecological studies in the late 1960s are associated to the lack of trained  
221 manpower and political instabilities in the country. Exclusive to Haramaya and Gondar, which  
222 were colleges of agriculture and health science respectively, there has been only one university  
223 with natural science programme, the so-called Haile Selassie I University, current Addis Ababa

224 University since the early 1970s. Furthermore, most of the experts were foreigners with limited  
225 knowledge about the vegetation of Ethiopia.

226 However, from the early 1980s, thanks to the flora project funded by Swedish International  
227 Development Cooperation Agency (SIDA), a Swedish organization, experts were trained on  
228 several disciplines such as plant ecology, plant systematics, ethnobotany, etc. Few of them are still  
229 staff members of Addis Ababa University. Furthermore, with the number of Universities in the  
230 country increasing from one in the 1960s to nearly 50 after fifty years. Concurrently, the number  
231 of publications rise steeply in the last five decades.

232 Globally, the extinction of single-authored articles has been confirmed in various disciplines  
233 [17]. Similarly, in the present study, single-authored articles showed a declining trend. This is  
234 mainly due to the fact that the research projects are either multidisciplinary or students and staff  
235 resulting with multiple authorship articles produce better quality research. Furthermore, most of  
236 the research are theses/dissertation outputs which include theses/dissertation supervisors and  
237 students contributing to multi-authored articles.

## 238 **Themes of the research topics**

239 In the 21<sup>st</sup> century, researches are supported by many technology products such as equipment  
240 for experiments, software programs for statistical analysis, and other applications such as GIS and  
241 remote sensing which support field works. Consequently, the number of plant ecology articles  
242 published and the research theme is dramatically increasing globally [18]. In the present systematic  
243 review, however, the research theme is very narrow in contrast to the global trend. McCallen et  
244 al. [18] identified nearly 50 thematic areas in ecological research. However, it is less than five  
245 thematic areas, which were covered in the reviewed articles. A descriptive study on plant  
246 community ecology revolving on floristic composition and community structure dominated the

247 studies. The dominance of community ecology research was reported by Réale [19] in their review  
248 based on co-citation analysis although it was in the 1970s. This is, however, in contrast to a report  
249 by Carmel et al. [20] in which single species research found to be dominant.

250 Ethiopia's natural environment is extremely degraded. As a result, most of the environment in  
251 the country is a fertile ground to invasive alien, particularly, plant species. Numerous plant species  
252 have been recognized as invasive in Ethiopia. Although most of them are exotic, there are few  
253 native plants which turned into invasive. I have observed some of the species in the desert and  
254 semi-desert scrubland at elevation lower than 1000 m a.s.l. (e.g. *Parthenium hysterophorus* and  
255 *Prosopis juliflora*) and Afromontane forests at elevation above 2500 m a.s.l. These means the  
256 protected areas in the lowlands and highlands are prone to invasive species. However, a few studies  
257 investigated the distribution and impact of invasive species.

258 Their impact is profound in the rift valley. However, studies on this topic as well as this  
259 ecosystem are extremely limited. The persistent environmental degradation, increasing trend of  
260 invasive species, and climate change, is aggravating the impact of invasive species. Hence,  
261 research on this field is critically in need. Even though the study on invasive species distribution  
262 and cover is extremely important for its management, understanding the reproductive and dispersal  
263 ecology of the species also play a crucial role either for management or eradication of the  
264 undesirable invasive species.

265 Pollination is the core of ecological networks. Pollination, the often mutualistic interaction,  
266 plays a vital role in maintaining community stability and ecosystem function. Nevertheless, these  
267 interactions are threatened due to natural and anthropogenic disturbances leading to a global  
268 decline of pollinators. Plant-pollinator networks can potentially modify the population dynamics

269 and the occupied range of a plant species [21]. However, the contribution of pollination networks  
270 as driver of plant distribution and assemblage of plant communities has received little attention.  
271 Thus, there is a strong need to characterize plant–pollinator interactions at large spatial scales and  
272 especially with respect to dynamic communities, whose compositions and patterns of relative  
273 species abundance vary in time and space [21]. Pollinator diversity and abundance plays a crucial  
274 role in shaping plant communities.

275 However, studies revealed that pollinators’ diversity is declining at an alarming though most  
276 of the researches are on crop pollinators. In the anthropocene, the globe is warming. This is causing  
277 changes in species fundamental and realized environmental niches. As a result, plants are shifting  
278 their ranges and phenology. Consequently, this cause a plant-pollinator mismatches which leads  
279 to plant and pollinators diversity decline. The most species at risk could be plants that required  
280 specialized pollinators while the generalized ones are least affected. This is due to specialized  
281 plants will be more prone to pollen limitation because they are less likely to interact with any  
282 available pollinator [22]. The impact of low abundance and diversity of pollinators do not only  
283 influence individual plant species but do extend to plant communities. Hence, future plant ecology  
284 research in Ethiopia should consider pollination ecology.

285 The limited number of articles from experimental studies and advanced themes could be due  
286 to the lack of resources for experimental activities and limited expertise in these fields. Unlike the  
287 present study, Carmel et al. [20] and Asselin and Gagnon [4] revealed both observation and  
288 experimental studies shared almost equal contributions in their systematic review.

289 Although the Swedish organization (SIDA) made a contribution to training experts from  
290 different fields, the theme were bound to basic sciences. Hence, these experts have worked on  
291 descriptive research, and the encourage the students they supervised them to work their

292 theses/dissertation on similar topics. Once, the graduates are distributed to different universities,  
293 they follow the footsteps of their supervisors. As a result, redundancy of research thematic occurs  
294 throughout the country.

## 295 **Vegetation and plant community types**

296 Performing ecological research is not an easy task. Taking ecological data from the field  
297 requires physical fitness, withstanding harsh conditions, and other field phenomena. Most of the  
298 plant ecological research was in either the DAF or MAF vegetation types. This could be due to  
299 two main reasons. First, the highest priorities were given to forests and most of the forest cover in  
300 Ethiopia is found in these vegetation types. Second, the DAF and MAF are found in a relatively  
301 suitable climate where most of the population is currently residing. Furthermore, they are easily  
302 accessible. As a result, these are the most threatened vegetation types [23] which needs empirical  
303 research.

304 However, the other important vegetation types attracted little attention. Particularly, the  
305 Afroalpine and Ericaceous belt, which are the main sources of freshwater for the downstream  
306 population unexpectedly, received little attention. These could be due to either the unwelcoming  
307 environmental conditions such as extreme cold and inaccessibility or the little priority given to  
308 these vegetation types. Similarly, articles from the vegetation types from drylands/lowlands  
309 contributed little.

## 310 **Journal quartile of the articles published**

311 Journal impact factor (JIF) quartile is among the widely used indicator to evaluate the  
312 importance or visibility of a journal in its field [24]. JIF Q1 means a journal's impact factor is  
313 within the top 25% of the JIF distribution of a particular category showing high impact. On the  
314 other hand, Q4 means it is within the lowest 25% of the JIF distribution means lower impact.



315 Hence, the reviewed studies dominantly published their article in relatively high impact journals.  
316 Nevertheless, the significant number of studies published in unindexed journals is bleak to trace  
317 their impact.

## 318 **Recommendation and source of funding**

319 Research recommendations are always for stakeholders who are usually natural resource  
320 managers, decision, and policymakers. Thus, it should be based on the empirical data and  
321 conclusions made. This helps the stakeholders to decide based on the concrete data and  
322 recommendations. Furthermore, showing the thematic research gap would also have profound  
323 benefits. However, in the present study, most of the recommendations were not made based on  
324 the result. This in some way, shows either missed opportunity to help the stakeholders or obscure  
325 in the research objective. However, it doesn't mean that a study should always wind up by  
326 recommendation.

327 Whether the funding source is government or international, the funders might have their own  
328 interest. Oftentimes, funders are interested in making conservation decisions based on scientific  
329 evidence [25], to maximize the beneficial outcomes of conservation, given the limited resources  
330 available [26]. It is interesting that the international funding dominated in the studies reviewed.  
331 However, the research components investigated by using international funding are more or less  
332 similar to the investigations conducted by government funding.

333 Furthermore, monitoring of the completed projects and incorporating the research  
334 recommendations into policy and decision-making is poorly noticed. For example, Teketay &  
335 Bekele [27], Hundera & Deboch [28] and Hundera et al. [29] recommended Wof-Washa, Gurra  
336 Farda, and Dodola forest as a nature reserve. However, they are not designated as a protected area  
337 yet [30]. Furthermore, forest and woodland cover loss are reported even in protected areas [31,32],

338 revealing loose policy and decision making. These could be due to three reasons. These are i) the  
339 government is responsible for integrating the research outputs into policies, ii) complexity of  
340 socio-ecological systems [33], lack of funding for conservation operations [34], and iii) lack of  
341 trustworthy scientific studies.

## 342 **Is plant ecology research growing up in Ethiopia?**

343 Debates were raised about the terminologies used to describe the development of ecology  
344 as a science [3,11]. Grace [3] suggested the question should be ‘is ecology growing up?’, not ‘Has  
345 ecology grown-up?’ like Peters [11] asked. Bringing Grace’s question to the Ethiopian perspective,  
346 If the frame is the number of published studies, plant ecology research is tremendously growing  
347 up. Even though evaluating the quality of research needs a different pathway, the quality of plant  
348 ecological in Ethiopia is not growing up. The criteria here is the research theme, methods applied,  
349 and depth of the study. This is excluding the land use/land cover change domain. Plant community,  
350 more or less, descriptive studies, dominated the plant ecology research thematic. This topic has  
351 been the center of plant ecological research in the 1960s to 1970s in Europe and Northern America.  
352 Hence, although it seems best to bring this thought to the academia, plant ecology in Ethiopia is  
353 still in the 1970s.

## 354 **Conclusions and future directions**

355 This study systematically synthesized trends of plant ecology research in Ethiopia over the last  
356 50 years. Plant community more or less, descriptive studies, dominated the plant ecology research  
357 thematic most of them distributed in the DAF and MAF while the Afroalpine and Ericaceous Belt,  
358 woodland (ACB & CTW), and desert and semi-desert scrubland (DSS) vegetation types got little

359 attention. Hence, the following future directions are suggested to improve the forthcoming plant  
360 ecology research in Ethiopia.

361 1. Future plant ecology research should gear to contemporary ecological researches. These  
362 include the application of remote sensing in vegetation ecology, climate change and  
363 vegetation ecology, plant functional ecology, vegetation temporal dynamics, and  
364 experimental approaches.

365 2. Experimental plant ecological studies are almost non-existent in the documents reviewed.  
366 Hence, future research should look into this perspective.

367 3. Establishing a committee that comprised plant taxonomists, plant ecologists, geologists,  
368 geographers, and GIS experts is recommended to investigate and map the plant community  
369 types at national level. This is crucial to allocate conservation resources objectively.  
370 Otherwise, fragmented studies of plant community types of a particular sites made  
371 conservation efforts challenging.

372 4. Recommendations from any research study, if available, should be based on the empirical  
373 information in order to make policy and decision justifiable.

374 5. Funders such as government agencies, NGOs, others including international ones are  
375 advised to provide resources to cover important topics such as invasive species ecology,  
376 application of GIS and remote sensing in vegetation ecology, and community interactions.  
377 Supervisors should also take the lion's share in helping graduate students identify  
378 contemporary ecological research areas such as pollination ecology.

379 6. The Ethiopian Ministry of Science and Higher Education (MoSHE) should establish a  
380 database both for completed and ongoing research projects i.e., project registration in  
381 addition to what exists at various universities. This would help to avoid project redundancy.

382

## 383 **Reference**

- 384 1. Hagen JB. History of Plant Ecology. Encyclopedia of Life Sciences (ELS). John Wiley &  
385 Sons, Ltd; 2010. pp. 1–5. doi:10.1002/9780470015902.a0003288.pub2
- 386 2. Mueller-Dombois D, Ellenberg H. Aims and methods of vegetation ecology. Toronto,  
387 Canada: John Wiley & Sons; 1974.
- 388 3. Grace J. Has ecology grown up? Plant Ecol Divers. Taylor & Francis; 2019;12: 387–405.  
389 doi:10.1080/17550874.2019.1638464
- 390 4. Asselin H, Gagnon D. Trends in ecological research : reflecting on 21 years of  
391 Écoscience. Écoscience. Taylor & Francis; 2015;22: 1–5.  
392 doi:10.1080/11956860.2015.1120511
- 393 5. Clements F. Plant Succession: An Analysis of the Development of Vegetation. Carnegie  
394 Institution of Washington; 1916.
- 395 6. Gleason H. The Individualistic Concept of the Plant Association. Society. 1926;53: 7–26.  
396 doi:10.1007/s
- 397 7. Harper JL. A Darwinian approach to plant ecology. J Ecol. 1967;55: 247–270.
- 398 8. Harper JL. Population Biology of Plants. London: Academic Press; 1977.
- 399 9. Henderson PA. Ecological Methods. Encyclopedia of Life Sciences (ELS). John Wiley &  
400 Sons, Ltd: Chichester; 2012. pp. 1–6. doi:10.1002/9780470015902.a0003271.pub2
- 401 10. Beals EW. Vegetational Change Along Altitudinal Gradients: Studies in Ethiopia show

- 402 that discreteness of zonation varies with steepness of slope. *Sci New Ser.* 1969;165: 981–  
403 985.
- 404 11. Peters RH. *A Critique for Ecology*. Cambridge, UK: Cambridge University Press; 1991.
- 405 12. Haddaway NR, Macura B, Whaley P, Pullin AS. ROSES RepOrting standards for  
406 Systematic Evidence Syntheses : pro forma , flow - diagram and descriptive summary of  
407 the plan and conduct of environmental systematic reviews and systematic maps. *Environ*  
408 *Evid. BioMed Central*; 2018;7: 7. doi:10.1186/s13750-018-0121-7
- 409 13. Wassie A, Sterck FJ, Teketay D, Bongers F. Tree regeneration in Church forests of  
410 Ethiopia: Effects of microsites and management. *Biotropica.* 2009;41: 110–119. doi:0.111  
411 1 /j. 1 744-7429.2008.00449.x
- 412 14. Woldu Z, Saleem MAM. Grazing induced biodiversity in the highland ecozone of East  
413 Africa. *Agric Ecosyst Environ.* 2000;79: 43–52.
- 414 15. Friis I, Sebsebe Demissew, Breugel P van. *Atlas of the Potential Vegetation of Ethiopia*.  
415 Denmark: The Royal Danish Academy of Sciences and Letters; 2010.
- 416 16. van Breugel P, Kindt R, Lillesø JP., Bingham M, Demissew S, Dudley C, et al. Potential  
417 Natural Vegetation Map of Eastern Africa (Burundi, Ethiopia, Kenya, Malawi, Rwanda,  
418 Tanzania, Uganda and Zambia). Version 2.0. In: *Forest & Landscape Denmark and World*  
419 *Agroforestry Centre (ICRAF)*. 2015.
- 420 17. Barlow J, Stephens PA, Bode M, Cadotte MW, Lucas K, Newton E, et al. On the  
421 extinction of the single- - authored paper : The causes and consequences of increasingly  
422 collaborative applied ecological research. *J Appl Ecol.* 2018;55: 1–4. doi:10.1111/1365-

- 423            2664.13040
- 424    18.    McCallen E, Knott J, Nunez-mir G, Taylor B, Jo I, Fei S. Trends in ecology : shifts in  
425            ecological research themes over the past four decades. *Front Ecol Environ*. 2019;  
426            doi:10.1002/fee.1993
- 427    19.    Réale D, Khelifaoui M, Olivier P, Yves M. Mapping the dynamics of research networks in  
428            ecology and evolution using co-citation analysis ( 1975 – 2014 ). *Scientometrics*. Springer  
429            International Publishing; 2020; doi:10.1007/s11192-019-03340-4
- 430    20.    Carmel Y, Kent R, Bar-massada A, Blank L, Liberzon J, Nezer O, et al. Trends in  
431            Ecological Research during the Last Three Decades – A Systematic Review. *PLoS Med*.  
432            2013;8: e59813. doi:10.1371/journal.pone.0059813
- 433    21.    Pellissier L, Alvarez N, Guisan A. Pollinators as drivers of plant distribution and  
434            assemblage into communities. In: Patiny S, editor. *Evolution of plant–pollinator*  
435            *relationships*. Cambridge, UK.: Cambridge University Press; 2012.
- 436    22.    Knight TM, Steets JA, Vamosi JC, Mazer S, Burd M, Campbell DR, et al. Pollen  
437            limitation of plant reproduction: ecological and evolutionary causes and consequences.  
438            *Annu Rev Ecol Evol Syst*. 2005;36: 467–97.
- 439    23.    Woldu Z. Forest in the vegetation types of Ethiopia and their status in the geographical  
440            context. In: Edwards S, Demissie A, Bekelle Y, Haase G, editors. *forest genetic resources-*  
441            *conservation: principles strategies and action*. Addis Ababa, Ethiopia; 1999.
- 442    24.    Liu W, Hu G, Gu M. The probability of publishing in first-quartile journals.  
443            *Scientometrics*. Springer Netherlands; 2015; doi:10.1007/s11192-015-1821-1

- 444 25. Burivalova Z, Miteva D, Salafsky N, Butler RA, Wilcove DS. Evidence Types and Trends  
445 in Tropical Forest Conservation Literature. *Trends Ecol Evol*. Elsevier Ltd; 2019;34: 669–  
446 679. doi:10.1016/j.tree.2019.03.002
- 447 26. Game E. Cross-discipline evidence principles for sustainability policy. *Nat Sustain*.  
448 2018;1: 452–454.
- 449 27. Teketay D, Bekele T. Floristic composition of Wof-Washa natural forest, Central  
450 Ethiopia : implications for the conservation of biodiversity. *Feddes Repert*. 1995;106:  
451 127–147.
- 452 28. Hundera K, Deboch B. Woody Species Composition and Structure of the Gurra Farda  
453 Forest, Snnpr, South Western Ethiopia. *Ethiop J Educ Sci*. 2008;3.
- 454 29. Hundera K, Bekele T, Kelbessa E. Floristics and phytogeographic synopsis of a dry  
455 afro-montane coniferous forest in the Bale mountain (Ethiopia): implications to biodiversity  
456 conservation. *Sinet Ethiop J Sci*. 2007;30: 1–12.
- 457 30. UNEP-WCMC. World database on protected areas user manual 1.5. Technical report.  
458 Cambridge, UK; 2017.
- 459 31. Nune S, Soromessa T, Teketay D. Land Use and Land Cover Change in the Bale  
460 Mountain Eco-Region of Ethiopia during 1985 to 2015. *Land*. 2016;5: 41.  
461 doi:10.3390/land5040041
- 462 32. Arafaine Z, Asefa A. Dynamics of Land Use and Land Cover in the Kafta-Sheraro  
463 National Park , NW Ethiopia : Patterns , Causes and Management Implications. *Momona*  
464 *Ethiop J Sci*. 2019;11: 239–257. doi:<http://dx.doi.org/10.4314/mejs.v11i2.5>

- 465 33. Miteva DA. Evaluation of biodiversity policy instruments: what works and what doesn't?  
466 Oxford Rev Econ Policy. 2012;28: 69–92.
- 467 34. Ferraro PJ, Pattanayak S. Money for nothing? A call for empirical evaluation of  
468 biodiversity conservation investments. PLoS Biol. 2006;4: 0482–0488.

469

## 470 **Supporting information**

471 **S1 Appendix.** Journals included in the review.

472 **S2 Appendix.** Studies included in the systematic review.



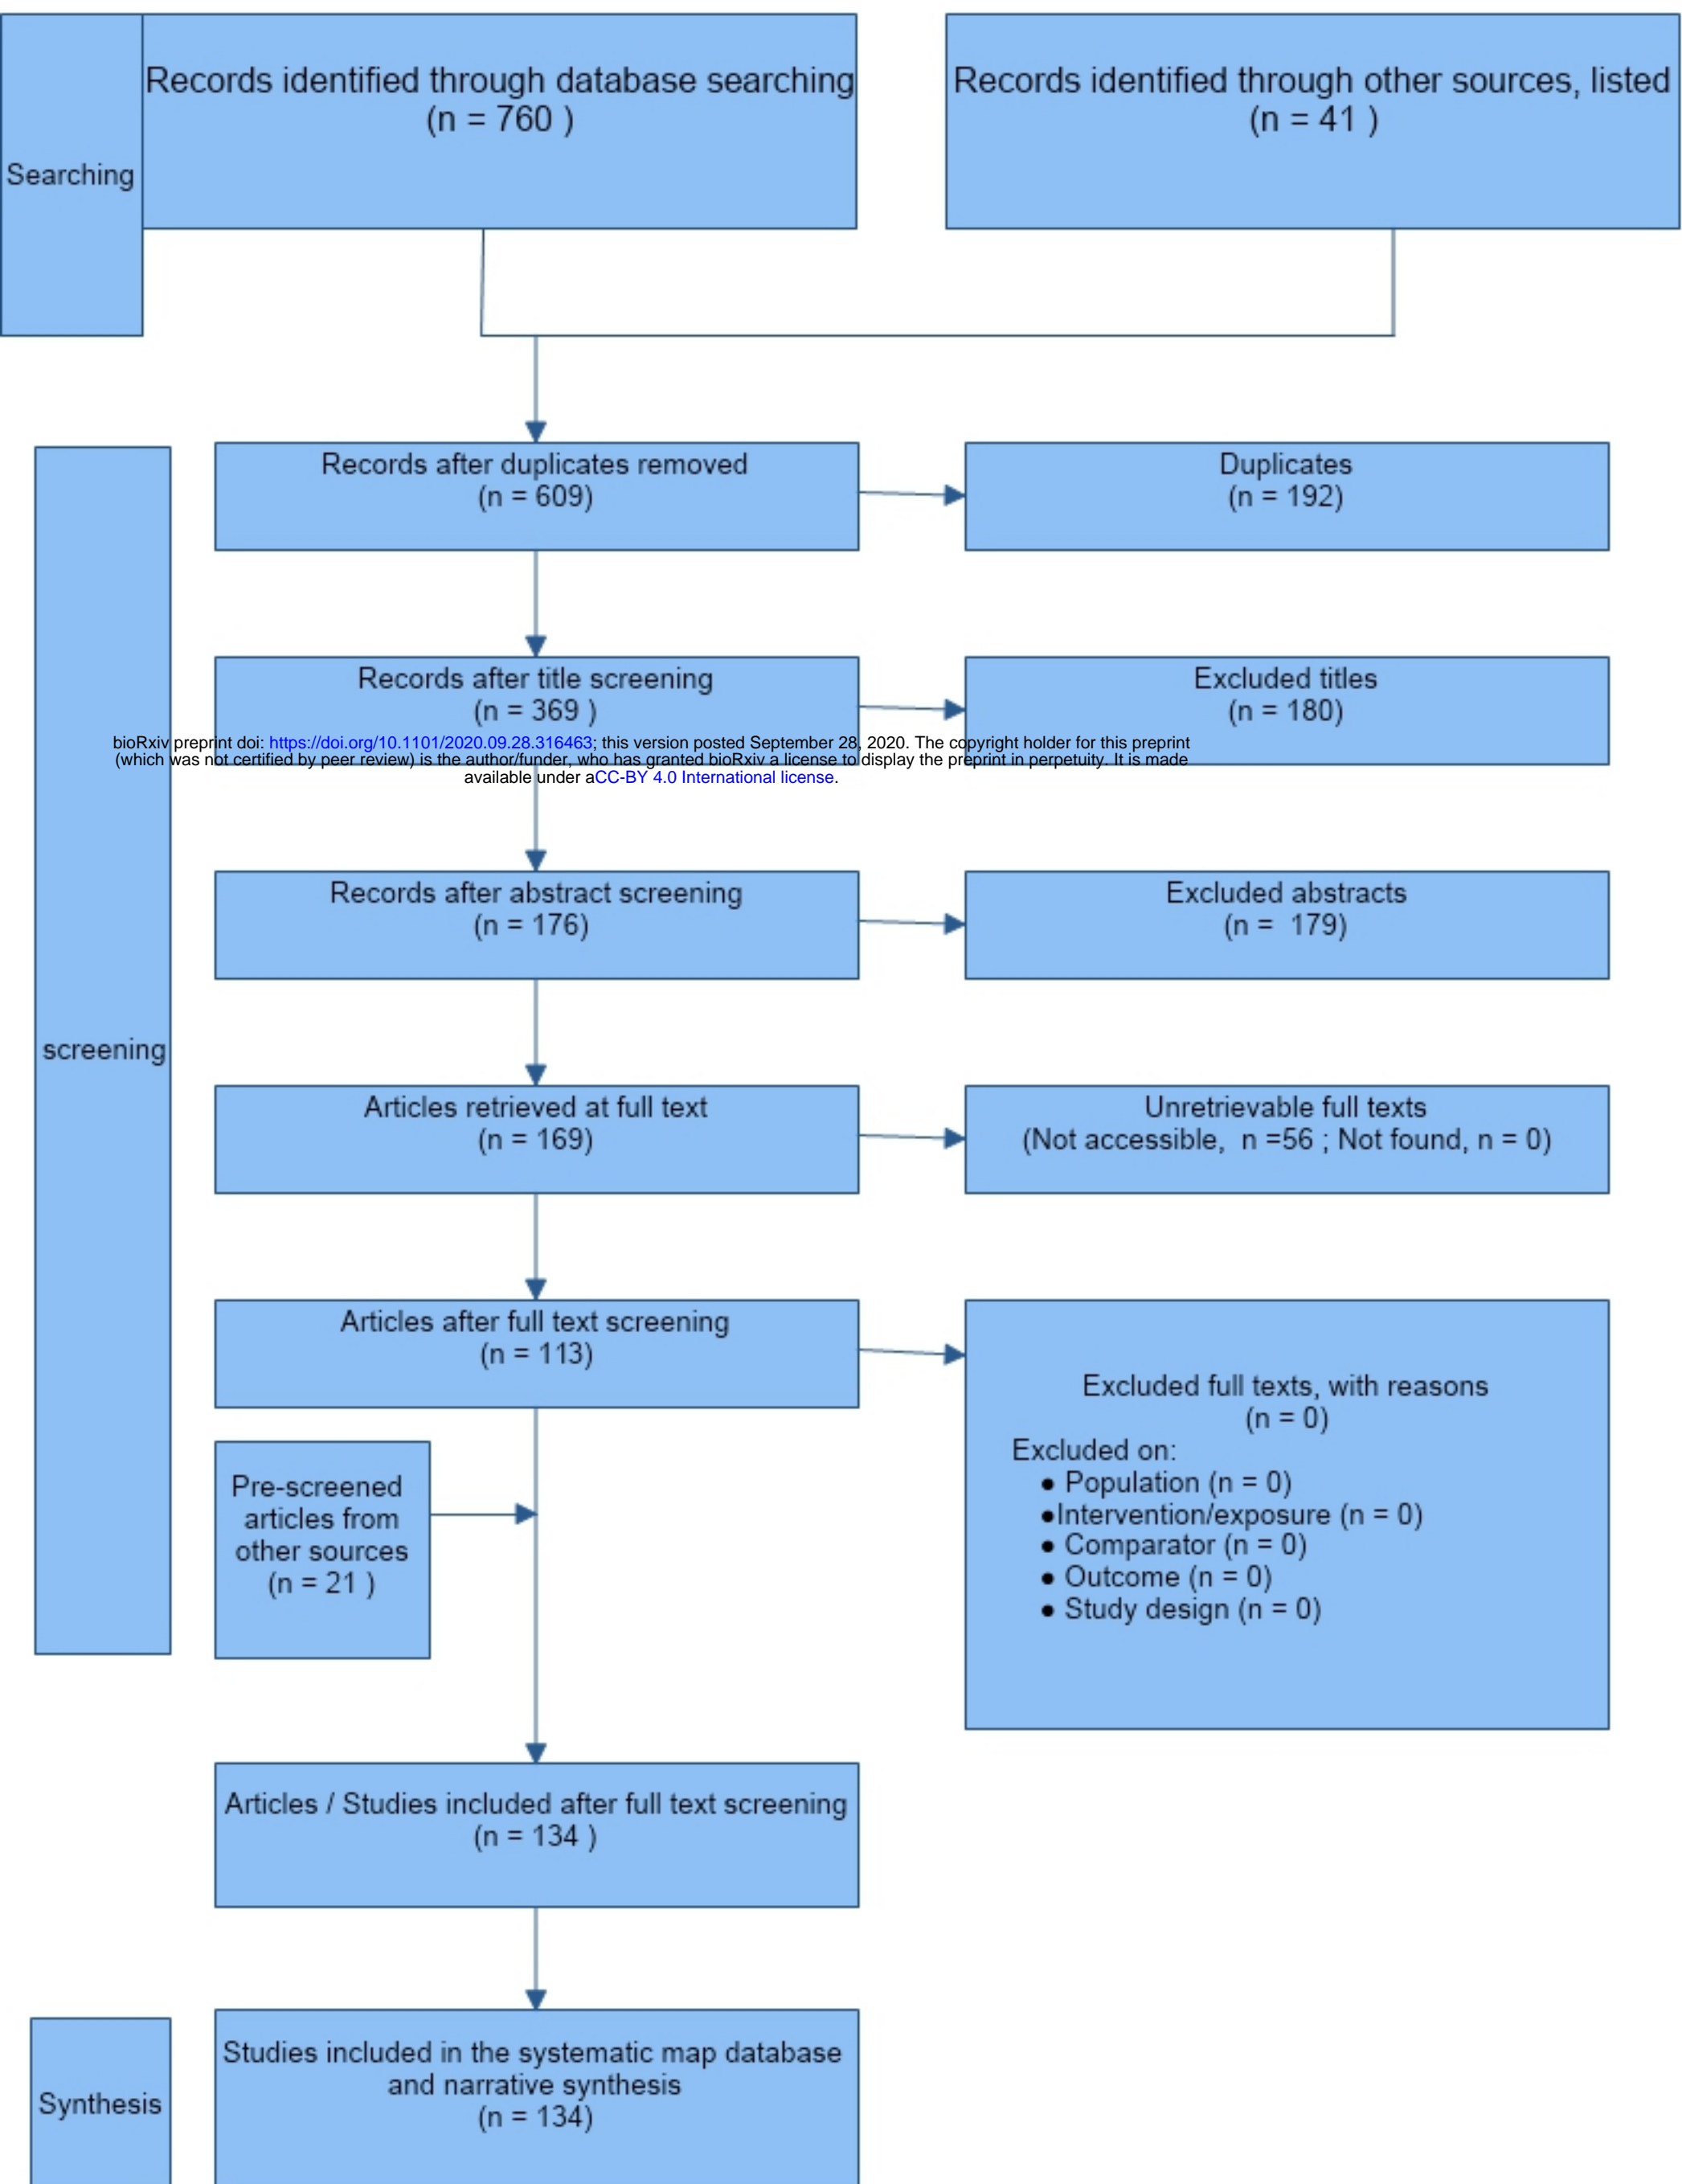

ROSES flow diagram for inclusion and inclusion of research

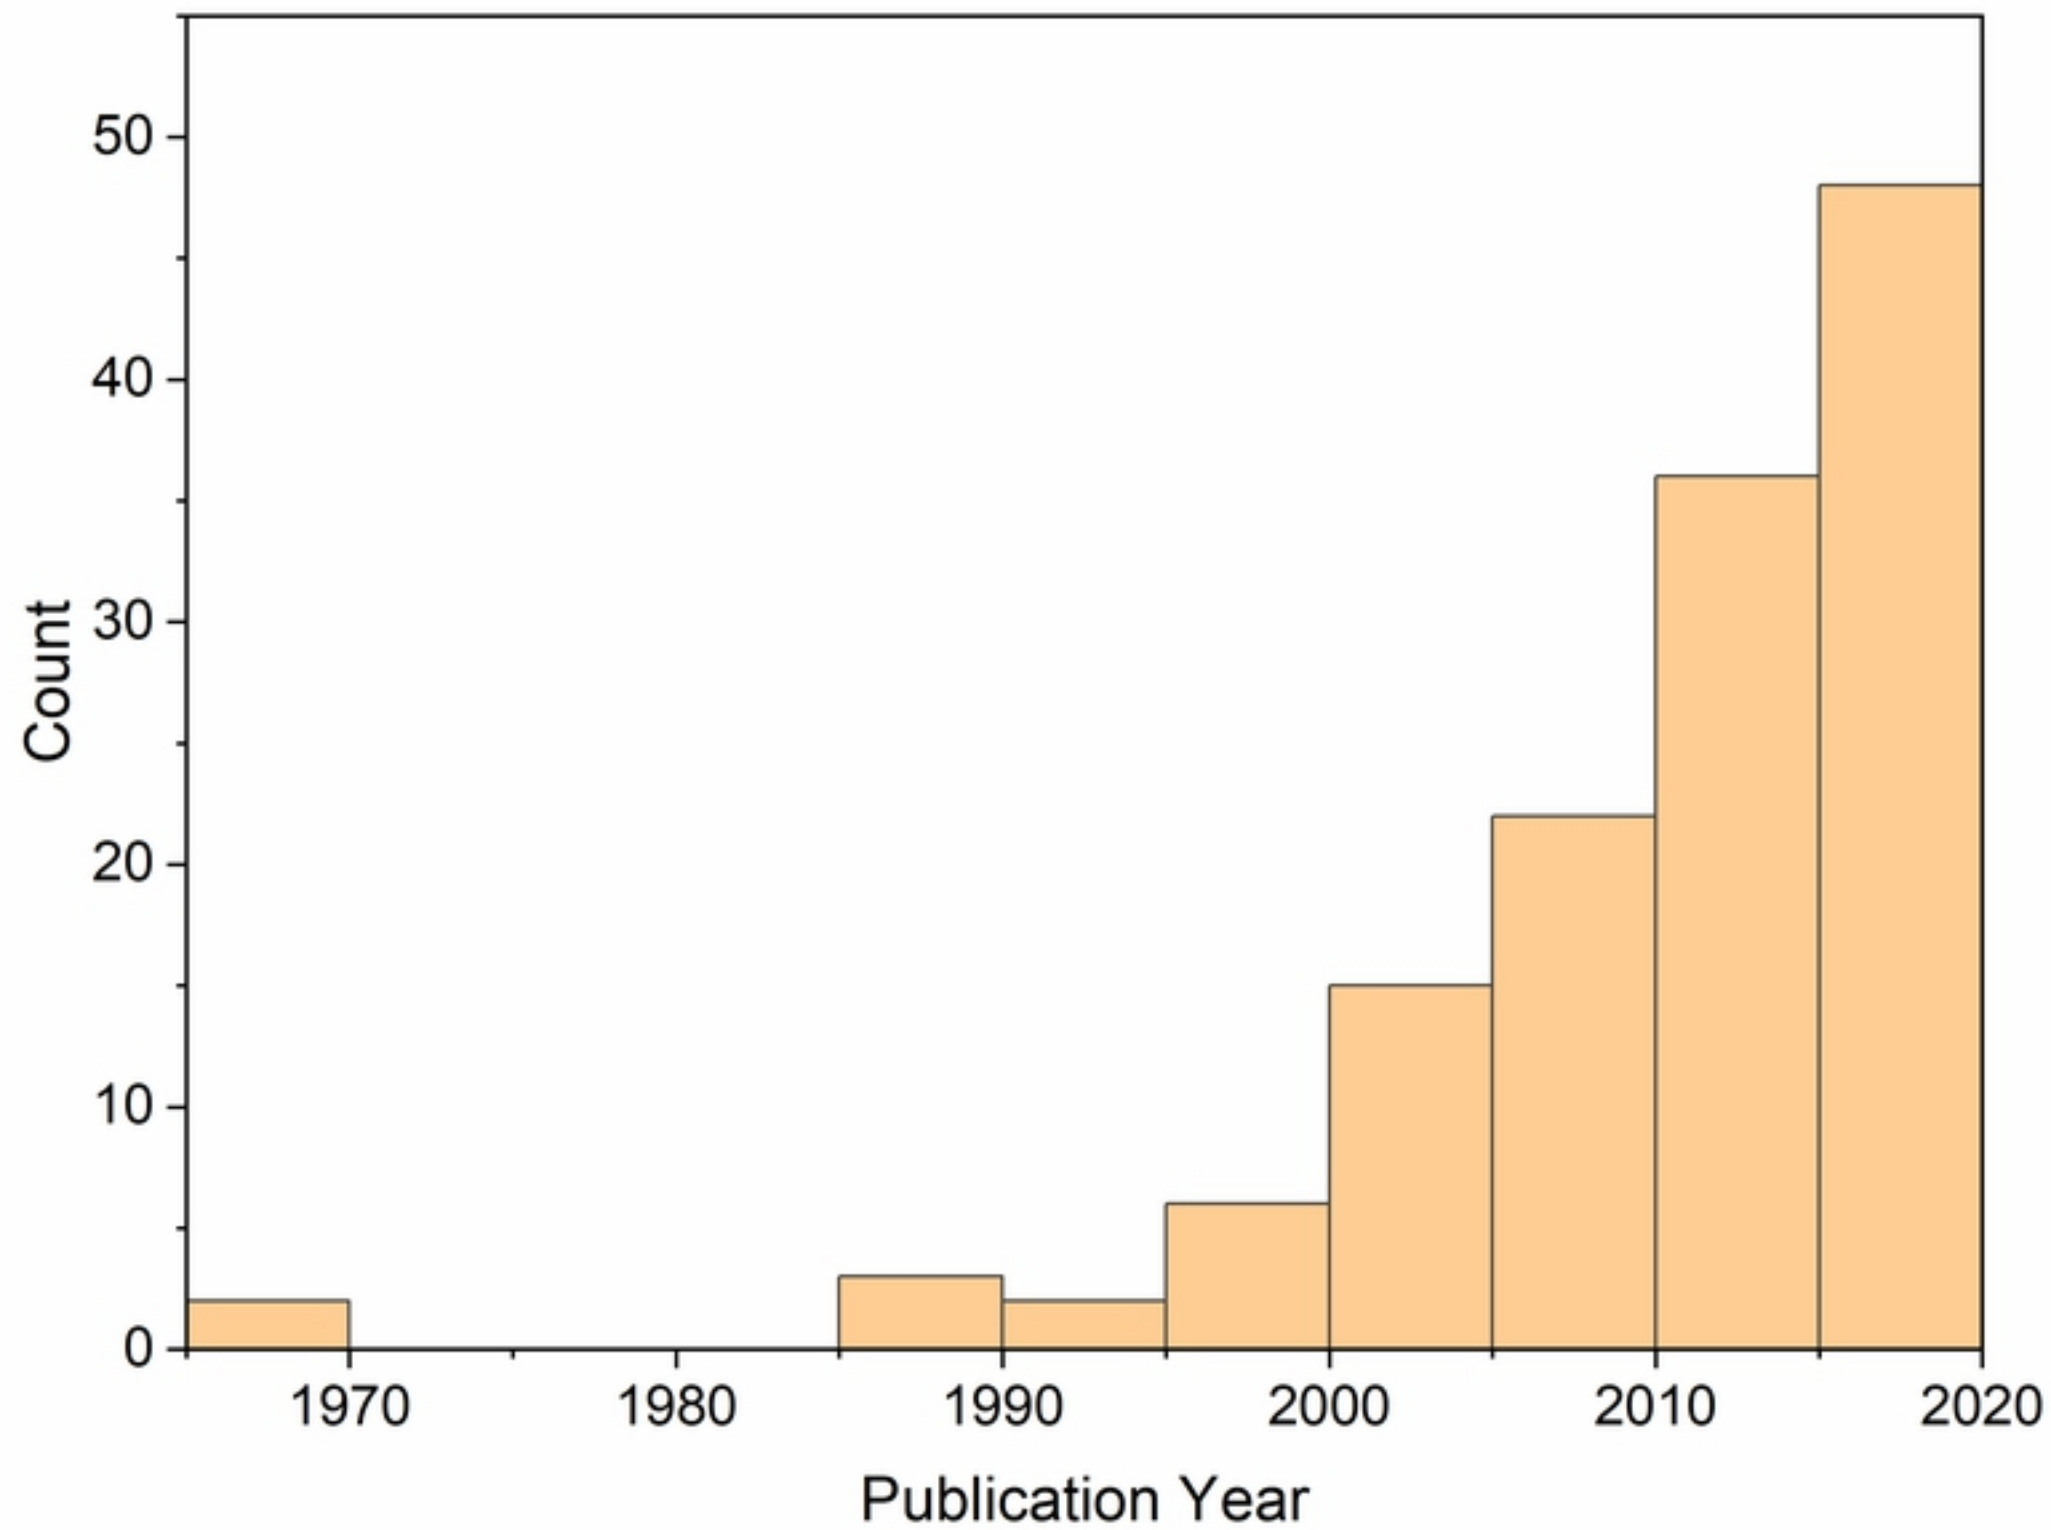

Trend of plant ecology research in Ethiopia. (A) Number of publi

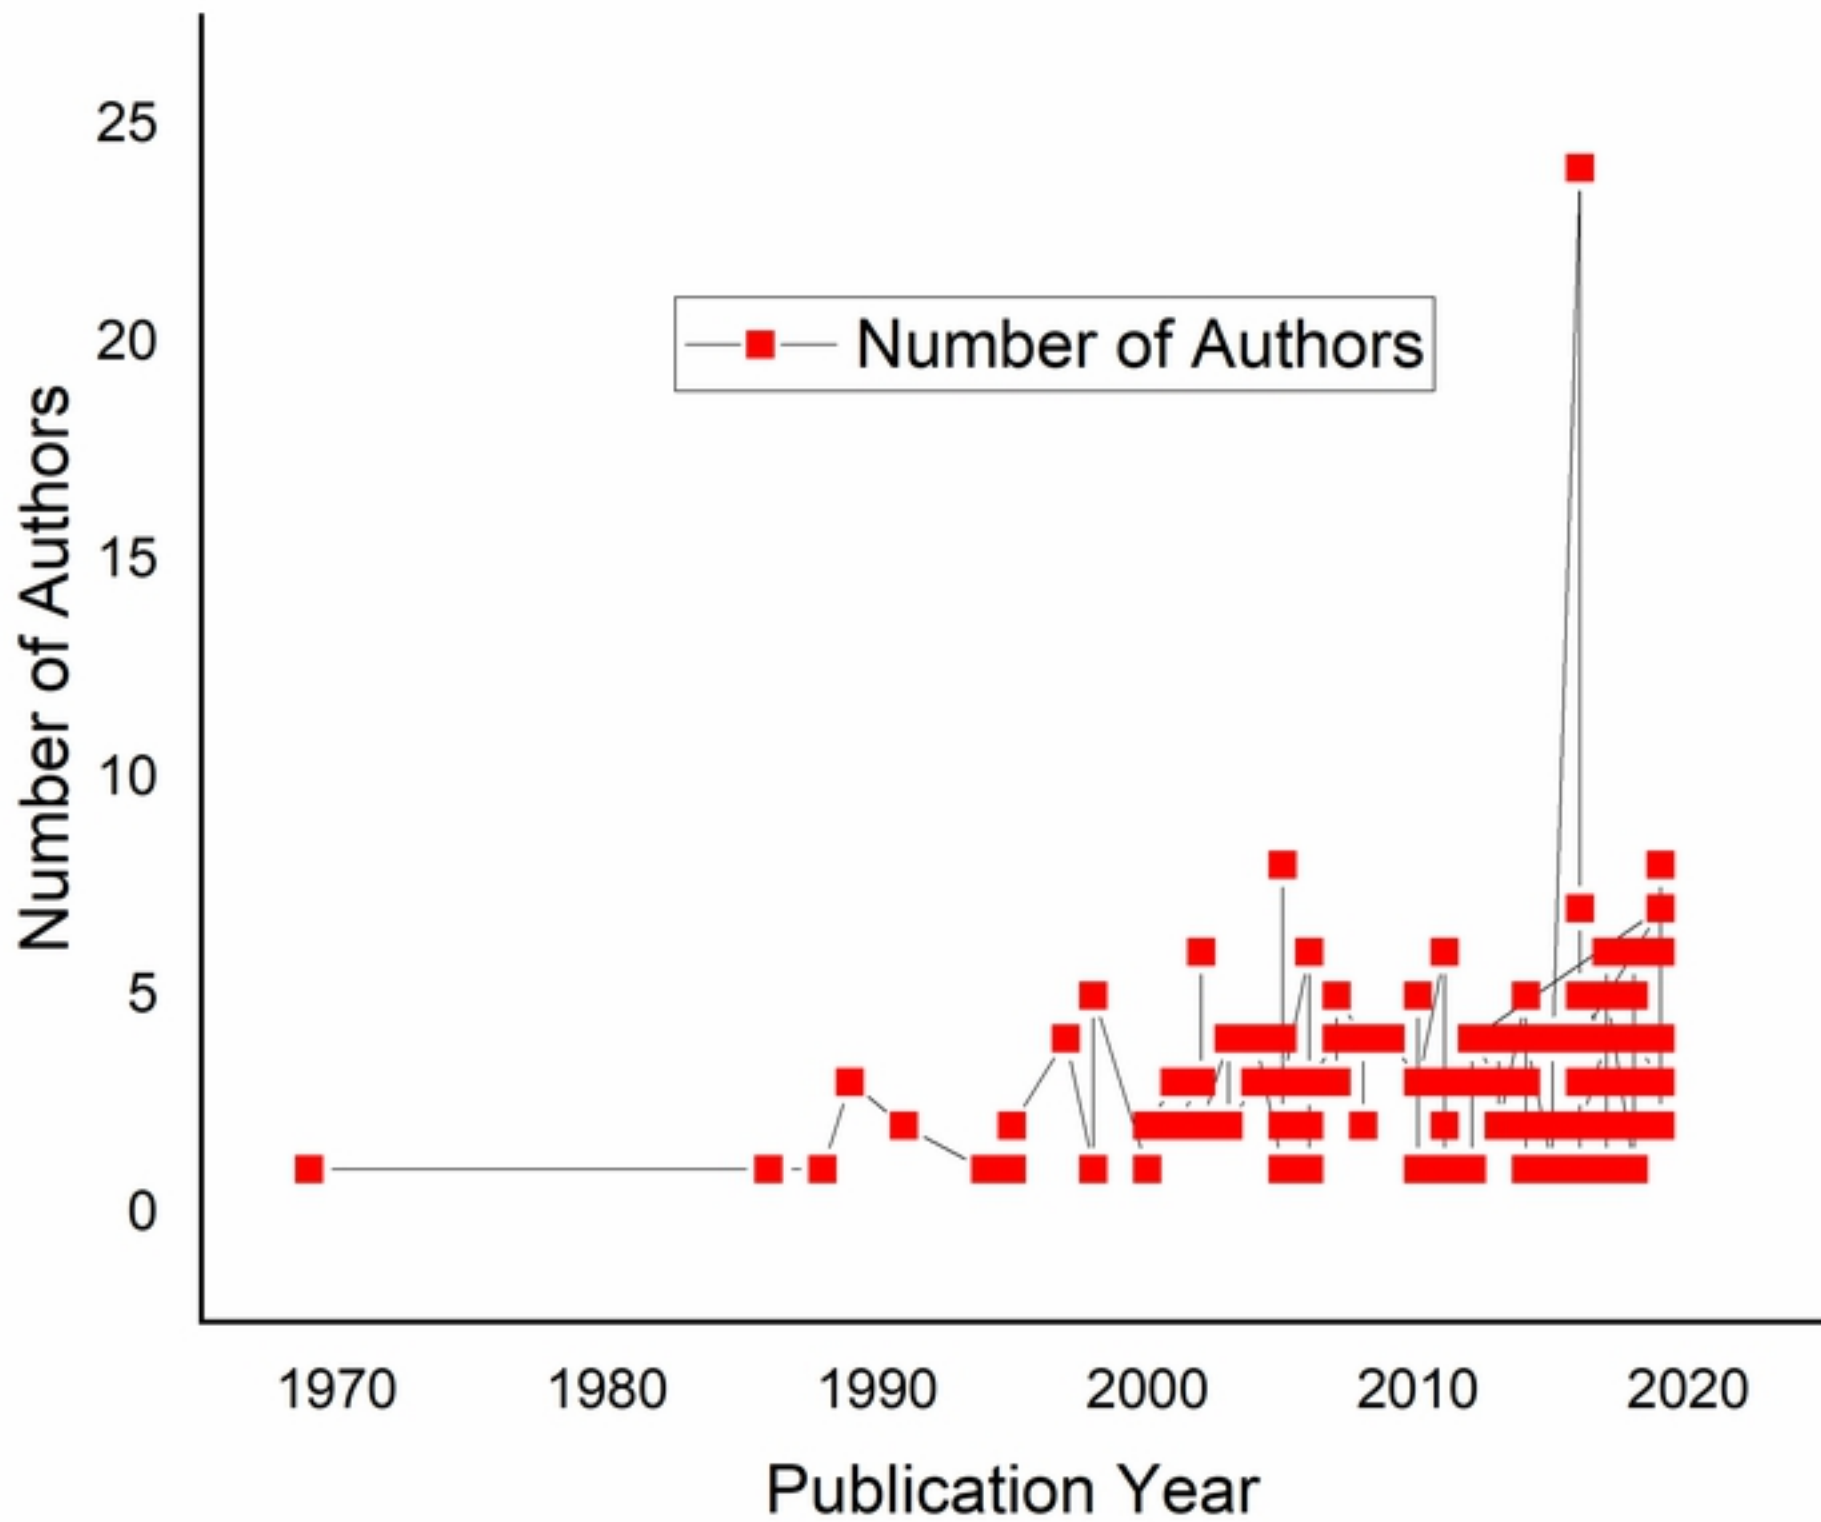

Trend of plant ecology research in Ethiopia. (B) trend of plant ec

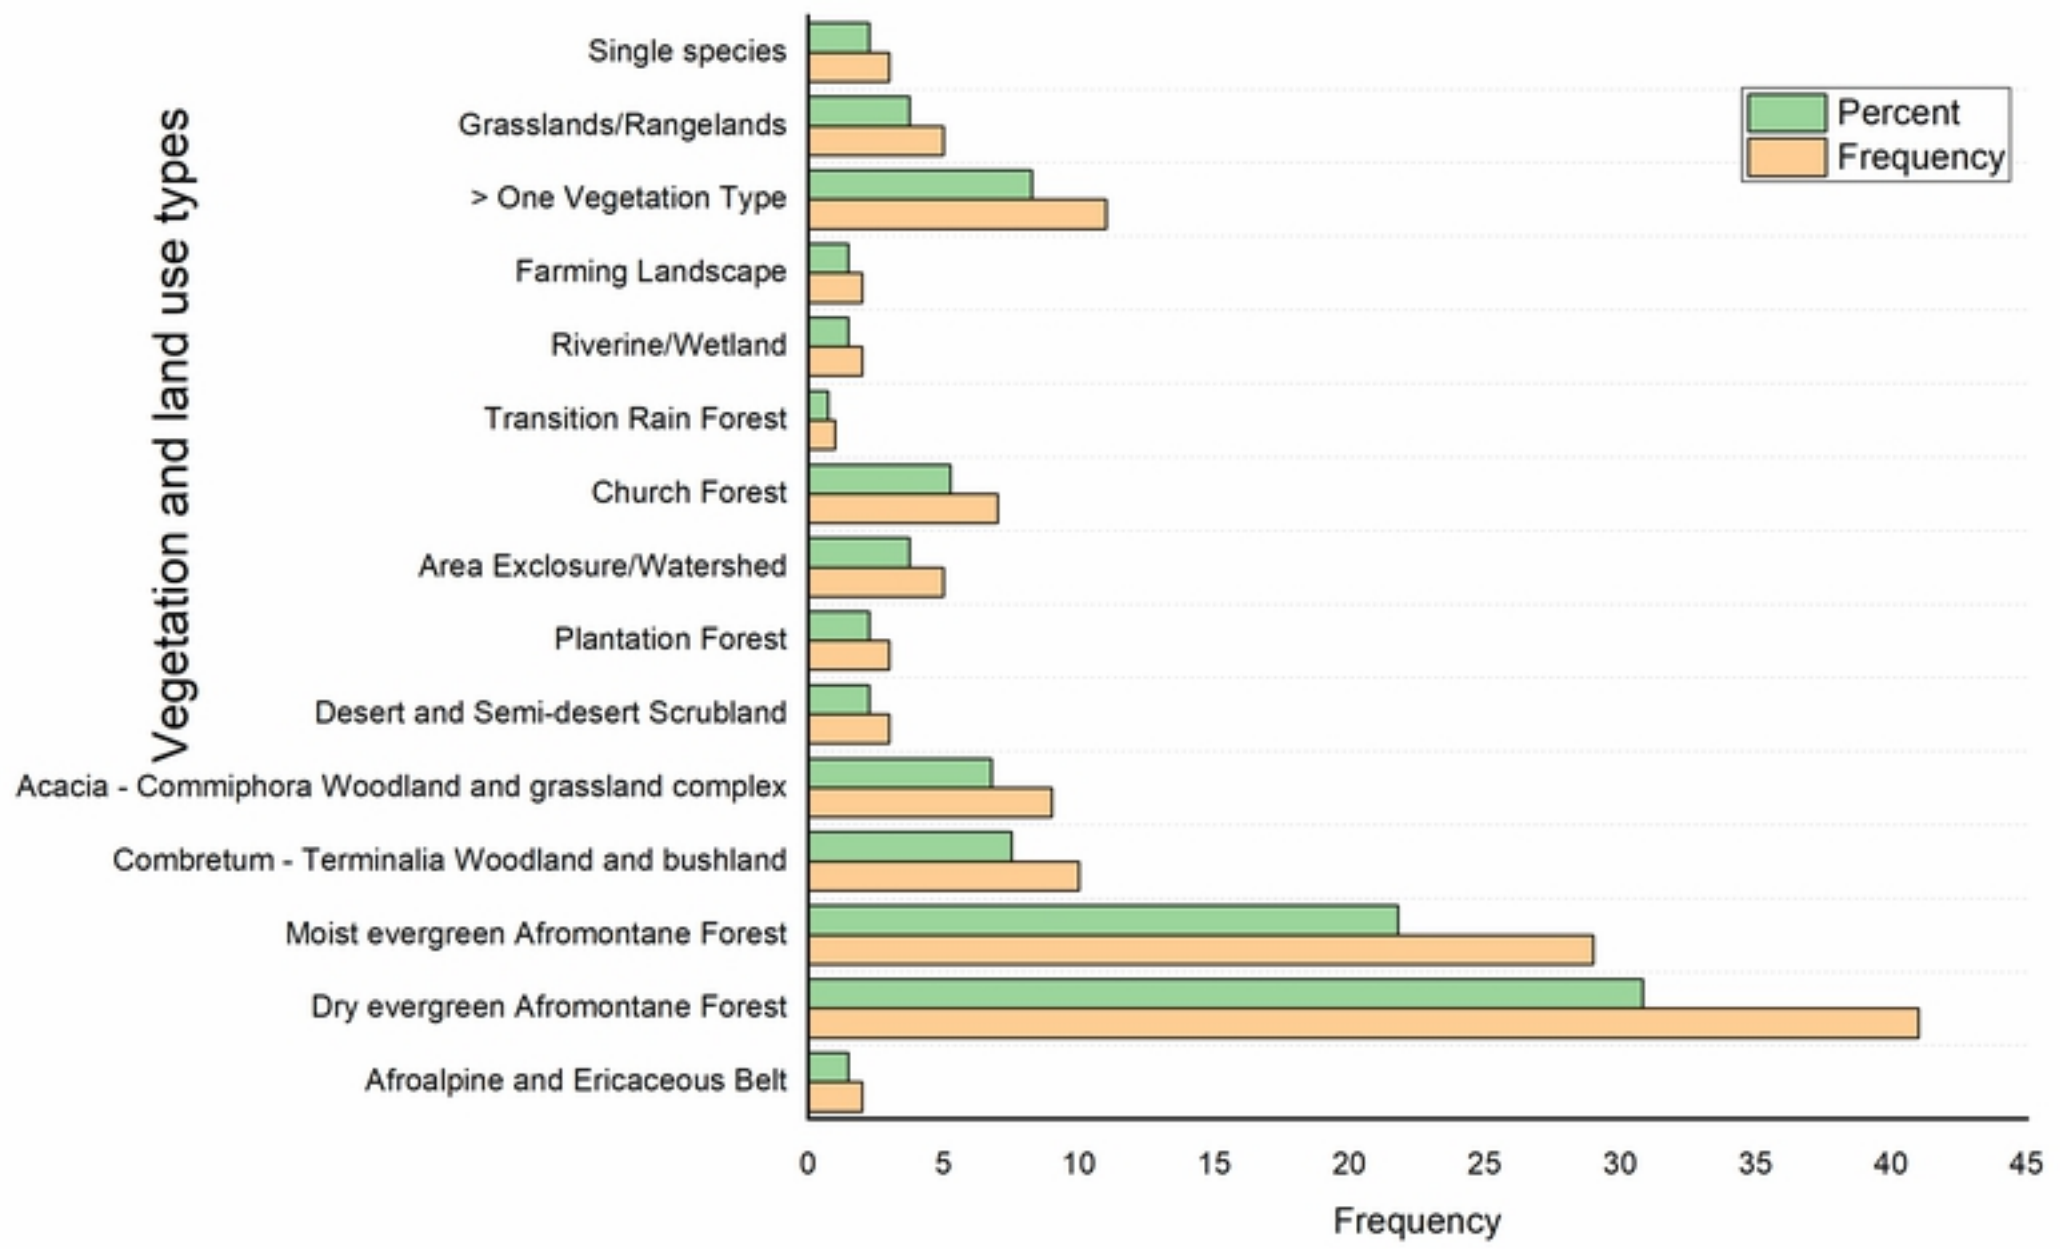

Distribution of the studies in vegetation types and land uses

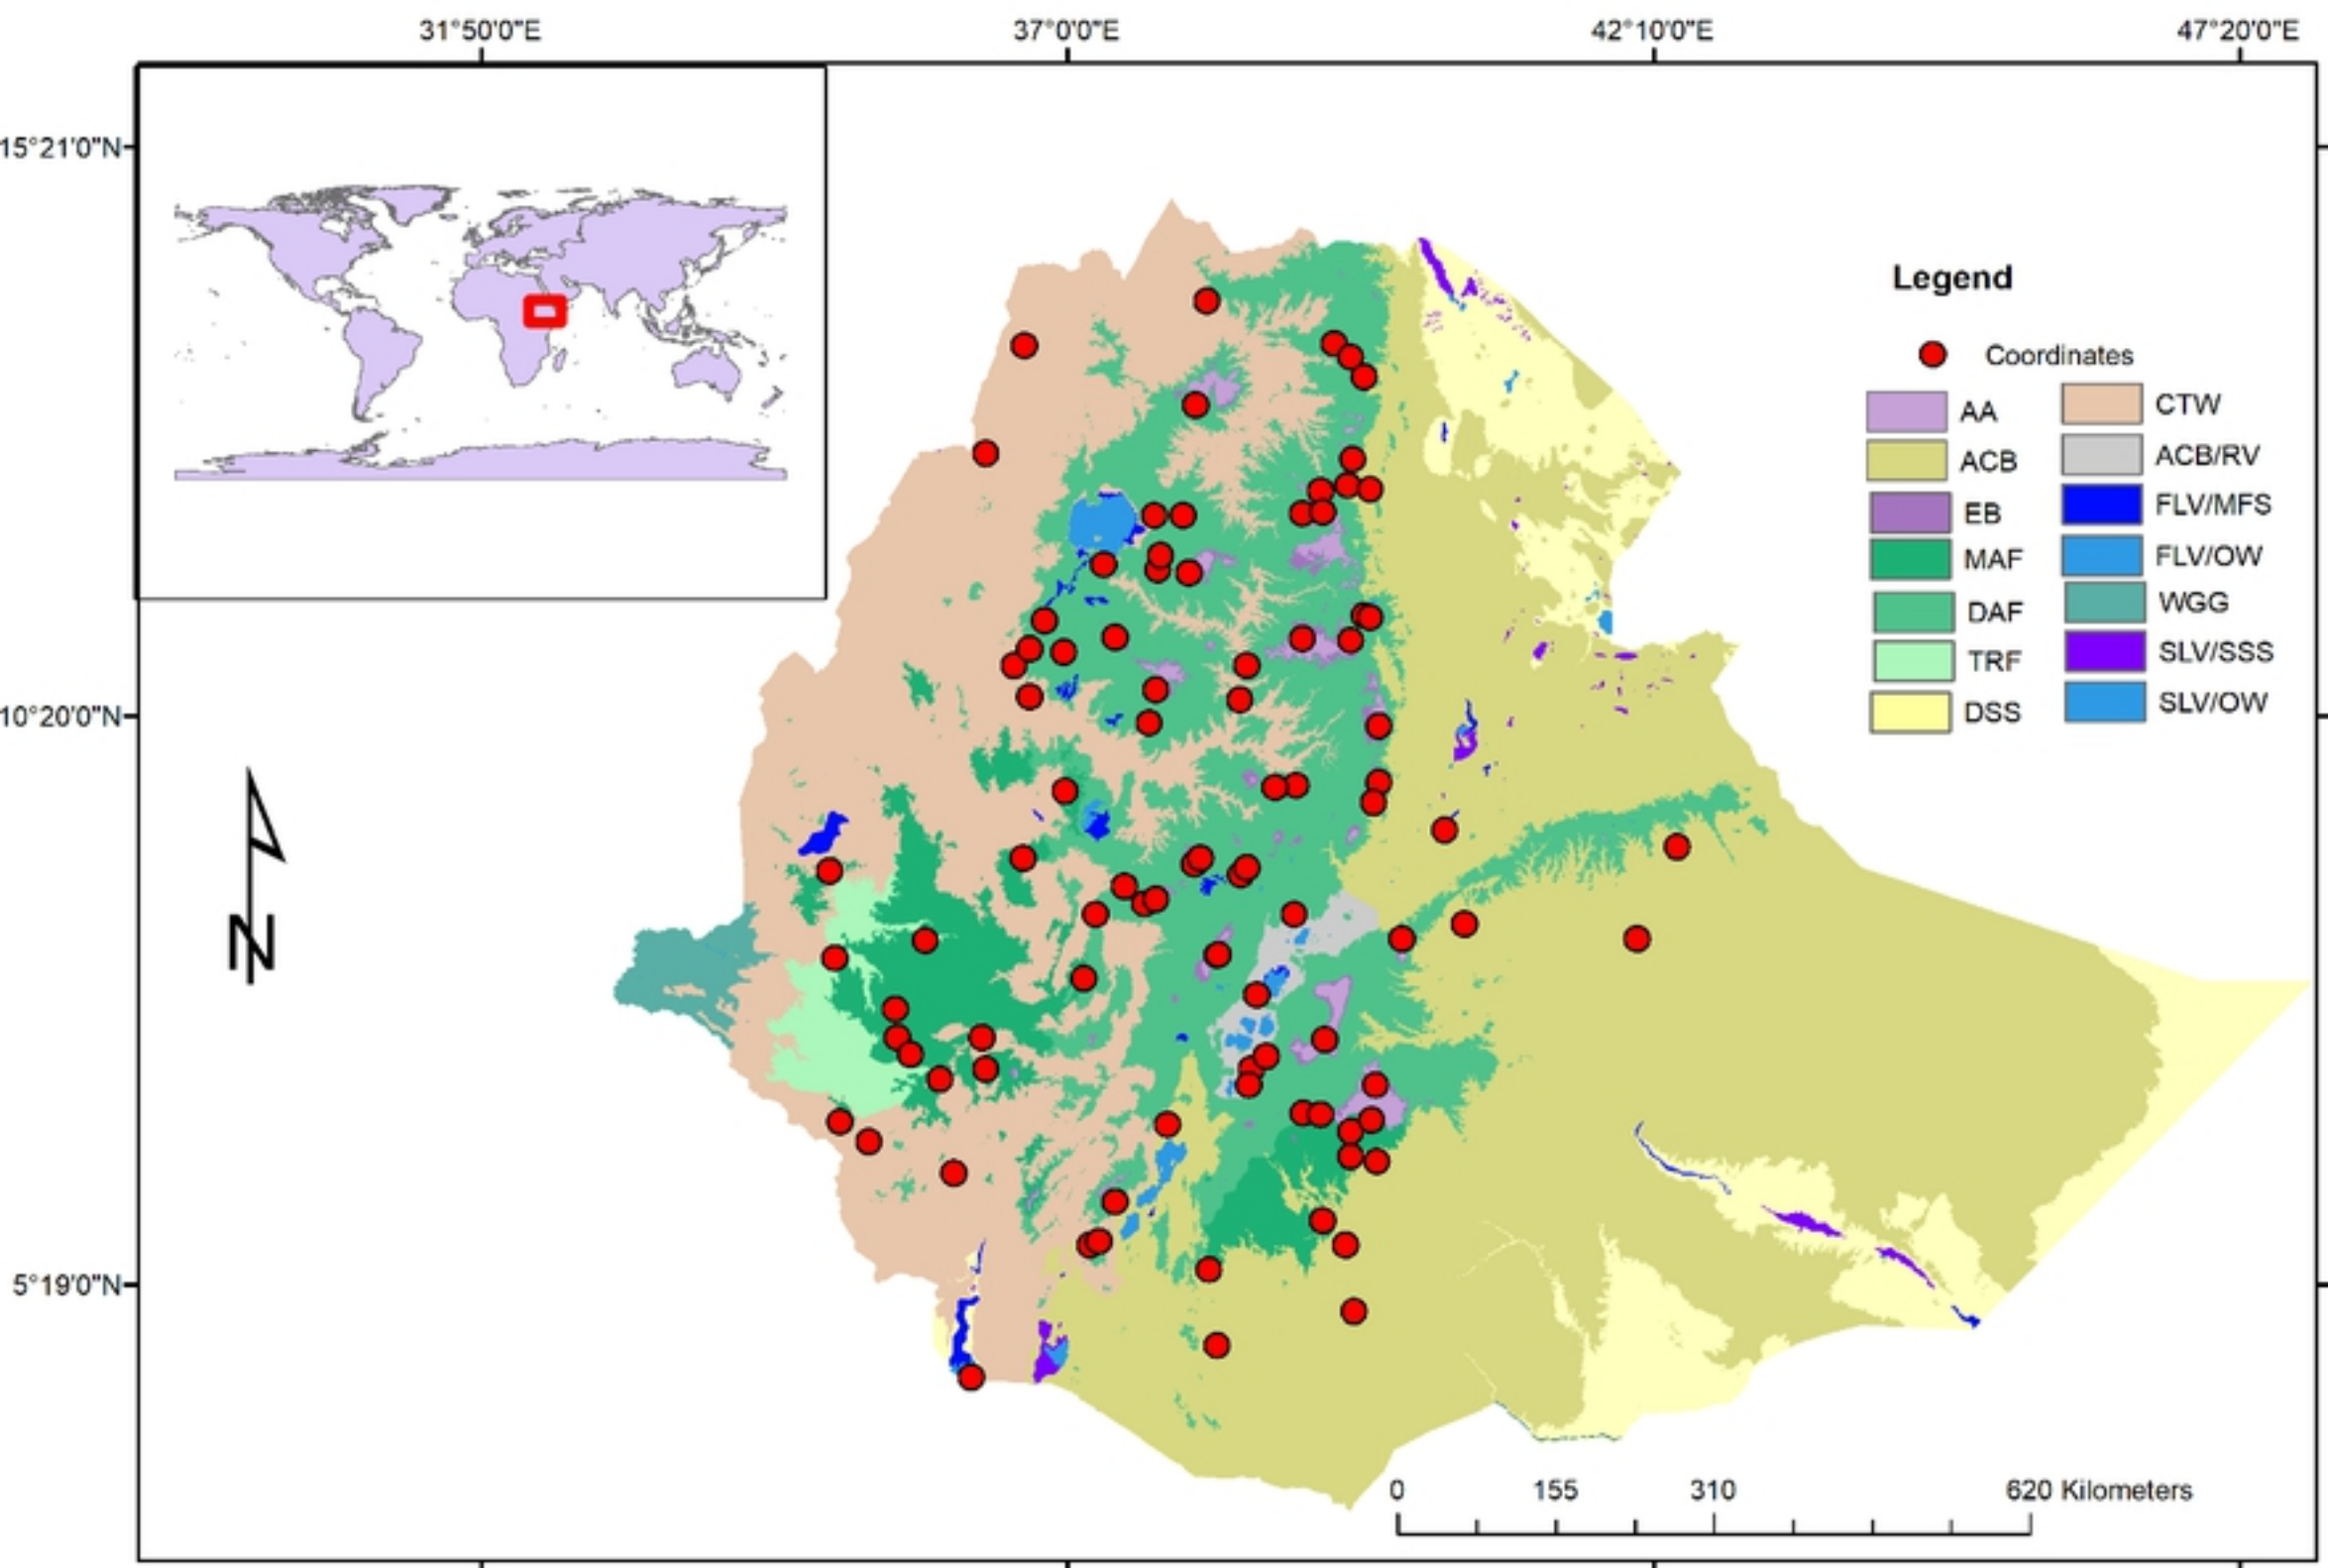

Map of the studies with formal coordinates (red dots) and the co

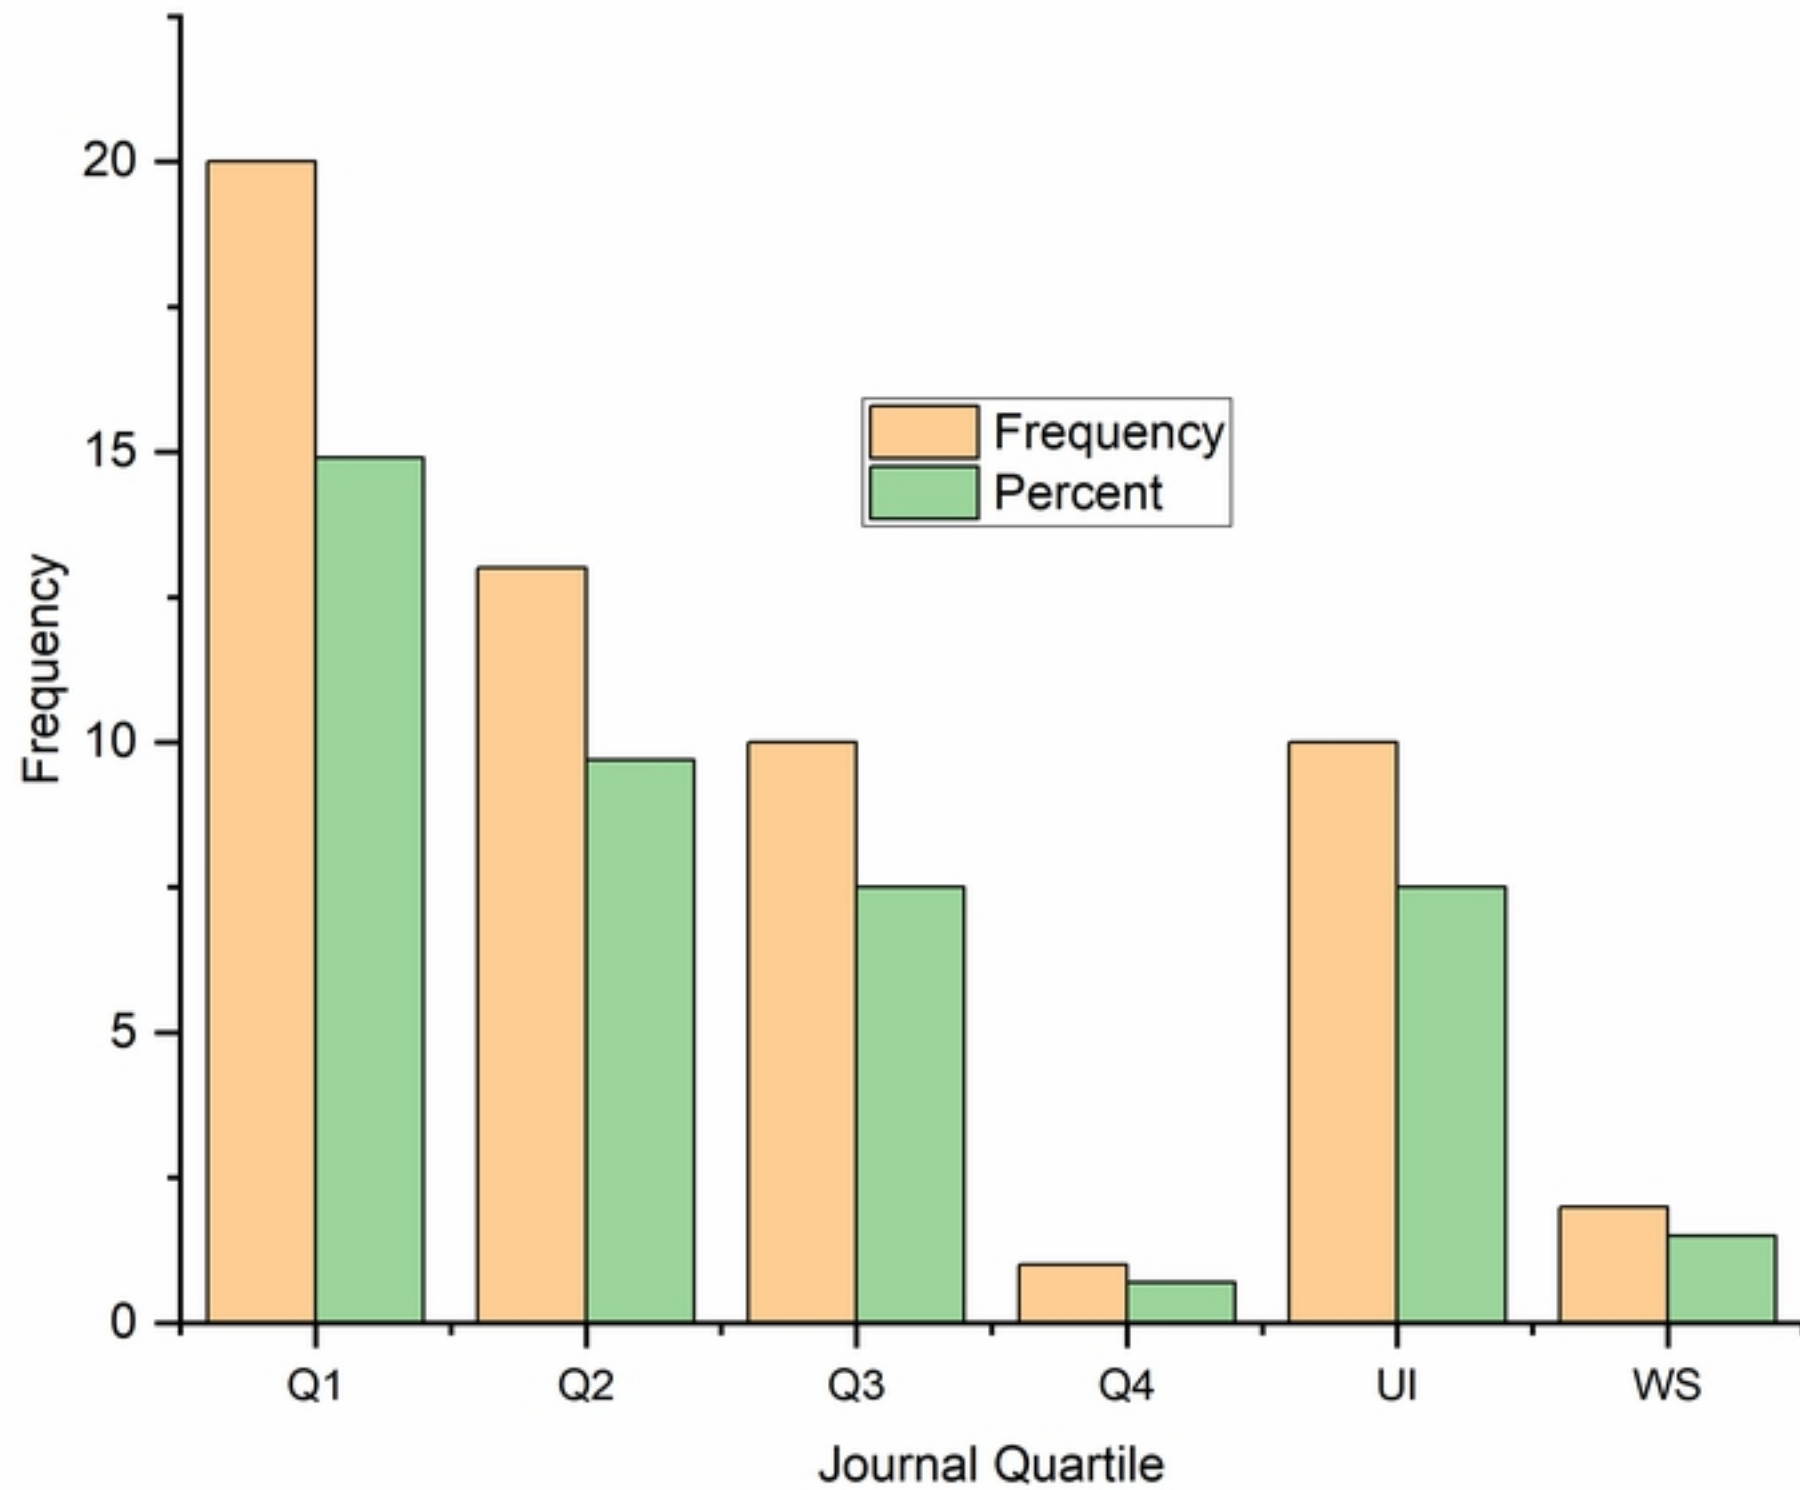

Journal quartile of the articles reviewed
